# Supplementary material for: Ionothermal synthesis of octahedral lanthanoid coordination networks exhibiting slow magnetization relaxation and efficient photoluminescence
Source: Royal Society of Chemistry journal article supplement (doi:10.1039/d0dt03353g), 2020-12-15
Supplement: d0dt03353g1.pdf [file d0dt03353g1.pdf]

# Ionothermal synthesis of octahedral lanthanide–organic coordination networks exhibiting slow magnetization relaxation and efficient photoluminescence

Ting-Hai Yang,<sup>\*a,c</sup> Shu-Fan Wang,<sup>a</sup> Chen-Lan Lin,<sup>a</sup> Xin Wang,<sup>a</sup> Binglong Zhu,<sup>a</sup> and Dayu Wu<sup>\*b</sup>

<sup>a</sup>*School of Chemistry & Environmental Engineering, Jiangsu University of Technology, Changzhou 213001, P. R. China. E-mail: tinghai\_yang@hotmail.com.*

<sup>b</sup>*School of petrochemical Engineering, Changzhou University, Changzhou 213164, P. R. China. E-mail: wudy@cczu.edu.cn*

<sup>c</sup>*State Key Laboratory of Coordination Chemistry, School of Chemistry & Chemical Engineering, Nanjing University, Nanjing 210093, P. R. China.*

## Contents

**Scheme S1** Coordination modes of H<sub>2</sub>pxdp<sup>2-</sup> ligand.

**Fig. S1** The six-coordinate Dy<sup>3+</sup> distorted octahedral geometry in **2**.

**Fig. S2** The arranged diagram of the two neighbor ligand for **2**.

**Fig. S3** Experimental PXRD patterns and simulated ones from single-crystal of **1**.

**Fig. S4** TG curves of complexe **1-3**.

**Fig. S5** Hysteresis loops in the range of 0-70 kOe for compound **2** at 1.8 K.

**Fig. S6** Temperature dependent in-phase ( $\chi_M'$ ) and out-of-phase ( $\chi_M''$ ) signals of **2** in zero dc field.

**Fig. S7.** Frequency dependence of the out-of-phase *ac* susceptibility of **2** at 1.8 K under different external fields.

**Fig.S8** Cole–Cole plots for **1** from 1.8 to 13 K under a dc field of 500 Oe.

**Fig. S9** The experimental emission quantum yield of **1**.

**Table S1.** Selected bond lengths [Å] for **1-3**.

**Table S1.** Selected bond angles [°] for **1-3**.

**Table S3.** Results of the Continuous Shape Measure Analysis geometry

**Table S4.** Relaxation Fitting Parameters from the Least-Square Fitting of **X** according to the Generalized Debye Model.

## Supporting Information

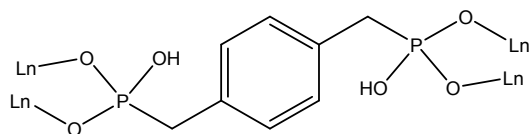

**Scheme S1** Coordination modes of  $\text{H}_2\text{pxdp}^{2-}$  ligand.

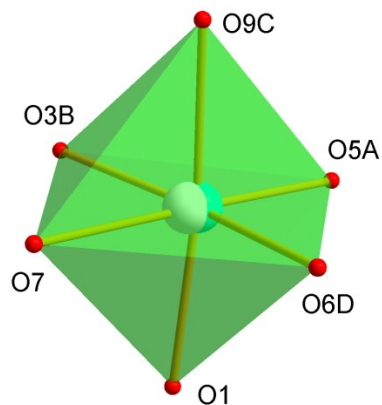

**Fig. S1** The six-coordinate  $\text{Dy}^{3+}$  distorted octahedral geometry in **2**.

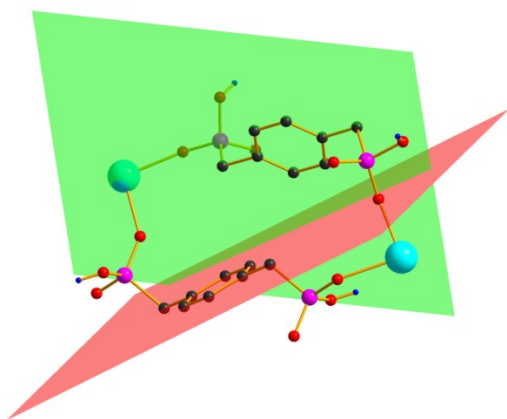

**Fig. S2** The arranged diagram of the two neighbor ligand for **2**.

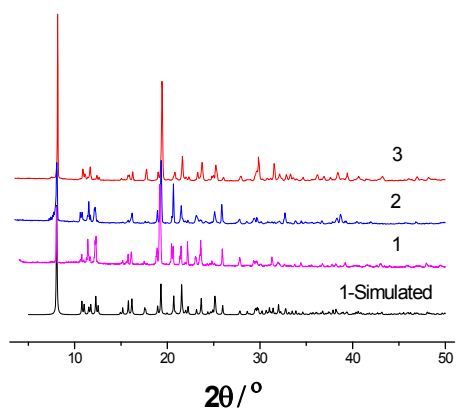

**Fig. S3** Experimental PXRD patterns of **1-3** and simulated ones from single-crystal of **1**.

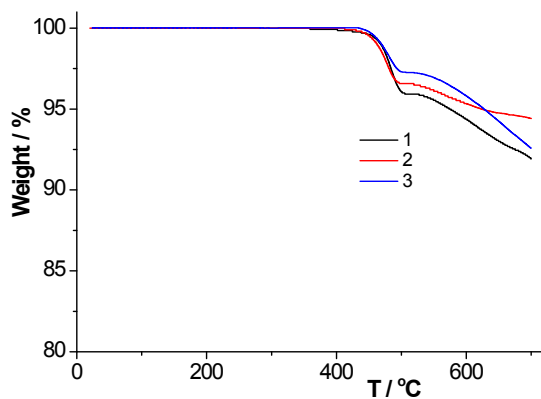

Fig. S4 TG curves of complexe 1-3.

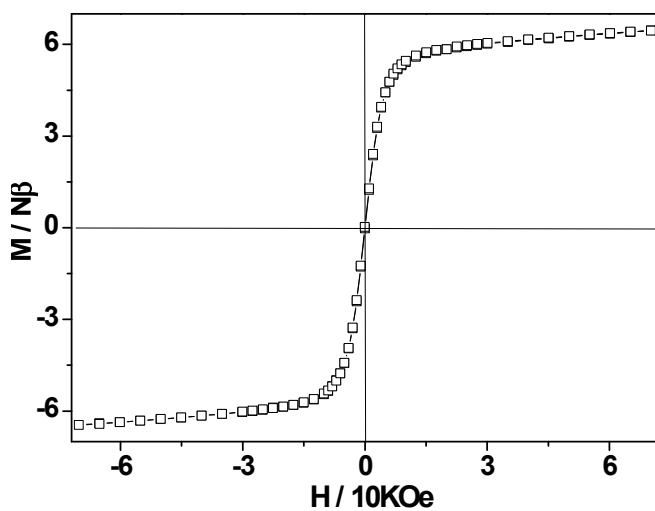

Fig. S5 Hysteresis loops in the range of 0-70 kOe for compound 2 at 1.8 K

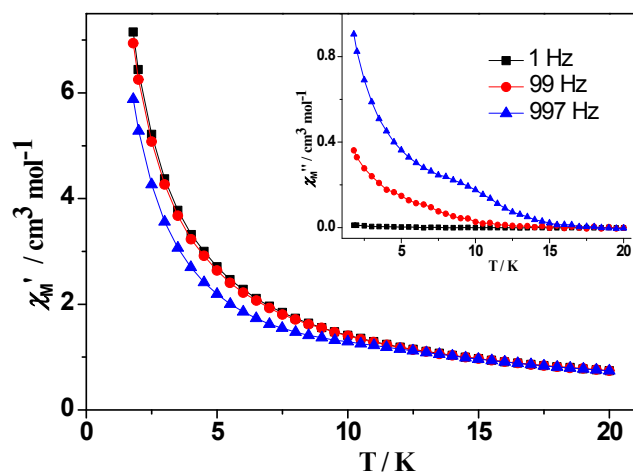

Fig. S6 Temperature dependent in-phase ( $\chi_M'$ ) and out-of-phase ( $\chi_M''$ ) signals of 2 in zero dc field.

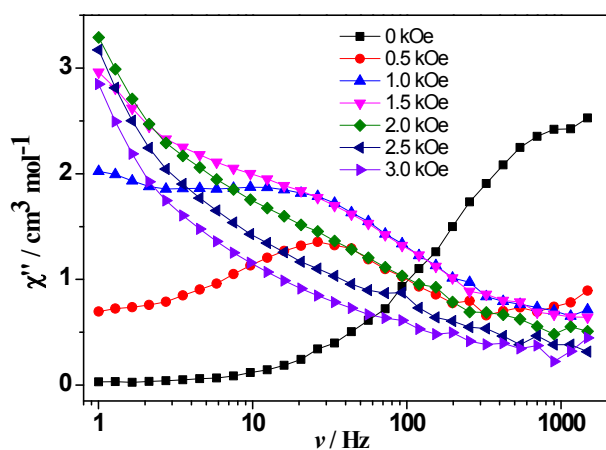

**Fig. S7.** Frequency dependence of the out-of-phase *ac* susceptibility of **2** at 1.8 K under different external fields.

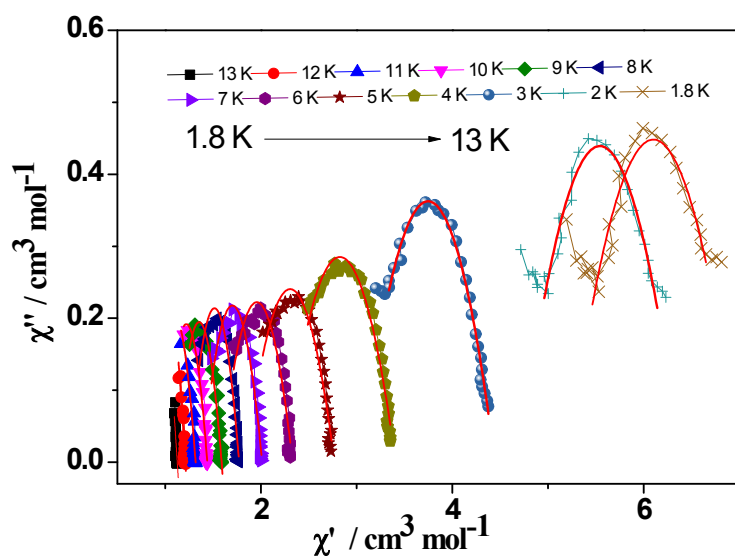

**Fig.S8** Cole–Cole plots for **2** from 1.8 to 13 K under a dc field of 500 Oe.

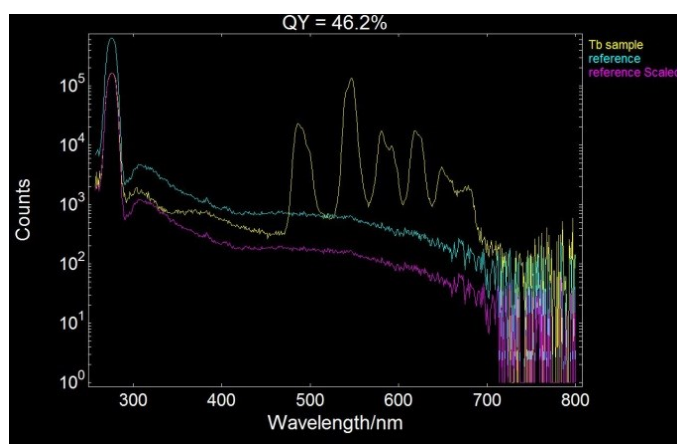

**Fig. S9** The experimental emission quantum yield of **1**.

**Table S1.** Selected bond lengths [Å] for **1-3**.

|             | <b>1(Tb)</b> | <b>2(Dy)</b> | <b>3(Ho)</b> |
|-------------|--------------|--------------|--------------|
| Ln(1)-O(5A) | 2.213(2)     | 2.2040(19)   | 2.1911(14)   |
| Ln(1)-O(1)  | 2.255(2)     | 2.2412(18)   | 2.2365(15)   |
| Ln(1)-O(3B) | 2.250(2)     | 2.2458(18)   | 2.2321(14)   |
| Ln(1)-O(9C) | 2.266(2)     | 2.2586(19)   | 2.2457(16)   |
| Ln(1)-O(7)  | 2.349(2)     | 2.3351(18)   | 2.3203(13)   |
| Ln(1)-O(6D) | 2.347(2)     | 2.3358(18)   | 2.3209(14)   |
| P(1)-O(1)   | 1.501(3)     | 1.502(2)     | 1.5018(16)   |
| P(1)-O(3)   | 1.506(2)     | 1.504(2)     | 1.5091(15)   |
| P(1)-O(2)   | 1.590(2)     | 1.595(2)     | 1.5962(15)   |
| P(1)-C(1)   | 1.785(3)     | 1.797(3)     | 1.794(2)     |
| P(2)-O(5)   | 1.499(2)     | 1.4976(19)   | 1.5007(15)   |
| P(2)-O(6)   | 1.521(2)     | 1.522(2)     | 1.5264(15)   |
| P(2)-O(4)   | 1.559(3)     | 1.561(2)     | 1.5645(17)   |
| P(2)-C(6)   | 1.785(3)     | 1.790(3)     | 1.793(2)     |
| P(3)-O(9)   | 1.493(3)     | 1.491(2)     | 1.4959(17)   |
| P(3)-O(7)   | 1.519(2)     | 1.5223(17)   | 1.5235(14)   |
| P(3)-O(8)   | 1.564(3)     | 1.567(2)     | 1.5715(16)   |
| P(3)-C(9)   | 1.801(3)     | 1.794(3)     | 1.804(2)     |

Symmerty codes : A: x,y+1,z-1 B: -x+1,-y+2,-z C: -x,-y+2,-z D: -x,-y+2,-z+1

**Table S2.** Selected bond angles [°] for **1-3**.

|                   | <b>1(Tb)</b> | <b>2(Dy)</b> | <b>3(Ho)</b> |
|-------------------|--------------|--------------|--------------|
| O(5A)-Ln(1)-O(1)  | 90.36(9)     | 90.62(8)     | 90.67(6)     |
| O(5A)-Ln(1)-O(3B) | 94.13(9)     | 94.18(7)     | 94.31(5)     |
| O(1)-Ln(1)-O(3B)  | 89.28(9)     | 89.32(7)     | 89.43(6)     |
| O(5A)-Ln(1)-O(9C) | 95.60(9)     | 95.38(7)     | 95.21(6)     |
| O(1)-Ln(1)-O(9C)  | 173.67(8)    | 173.72(7)    | 173.81(5)    |
| O(3B)-Ln(1)-O(9C) | 88.16(9)     | 88.38(7)     | 88.22(6)     |
| O(5A)-Ln(1)-O(7)  | 175.60(9)    | 176.17(7)    | 176.22(5)    |
| O(1)-Ln(1)-O(7)   | 86.69(8)     | 86.71(7)     | 86.54(5)     |
| O(3B)-Ln(1)-O(7)  | 82.59(8)     | 83.06(6)     | 83.12(5)     |
| O(9C)-Ln(1)-O(7)  | 87.24(8)     | 87.21(7)     | 87.50(5)     |
| O(5A)-Ln(1)-O(6D) | 99.80(9)     | 98.62(7)     | 98.30(5)     |
| O(1)-Ln(1)-O(6D)  | 93.90(9)     | 93.62(7)     | 93.58(5)     |
| O(3B)-Ln(1)-O(6D) | 165.68(8)    | 166.82(7)    | 166.99(5)    |
| O(9C)-Ln(1)-O(6D) | 87.20(9)     | 87.33(7)     | 87.47(6)     |

Symmerty codes : A: x,y+1,z-1 B: -x+1,-y+2,-z C: -x,-y+2,-z D: -x,-y+2,-z+1

**Table S3.** Results of the Continuous Shape Measure Analysis geometry<sup>a</sup>

| Geometry | OC-6  | TPR-6  | JPPY-6 | PPY-6  | HP-6   |
|----------|-------|--------|--------|--------|--------|
| <b>1</b> | 0.34  | 14.889 | 30.971 | 27.576 | 32.960 |
| <b>2</b> | 0.28  | 15.148 | 31.389 | 27.951 | 32.923 |
| <b>3</b> | 0.275 | 15.141 | 31.373 | 27.931 | 32.984 |

<sup>a</sup>OC-6 is the shape measure relative to the octahedron; TPR-6 is the shape measure relative to the trigonal prism; JPPY-6 is the shape measure relative to the Johnson pentagonal pyramid J2; PPY-6 is the shape measure relative to the pentagonal pyramid; HP-6 is the shape measure relative to the Hexagon. The number in bold corresponds to the closer ideal geometry to the real complexes.

**Table S4.** Relaxation Fitting Parameters from the Least-Square Fitting of **2** according to the Generalized Debye Model under a dc field of 500 Oe.

| Temperature / K | $\chi_S / \text{cm}^3\text{mol}^{-1}\text{K}$ | $\chi_T / \text{cm}^3\text{mol}^{-1}\text{K}$ | $\tau / \text{s}$ | $\alpha$ |
|-----------------|-----------------------------------------------|-----------------------------------------------|-------------------|----------|
| 4.0             | 0.3763                                        | 1.524                                         | 8.057E-4          | 0.4202   |
| 5.0             | 0.5026                                        | 1.397                                         | 7.79464E-4        | 0.38047  |
| 6.0             | 0.5896                                        | 1.310                                         | 7.15949E-4        | 0.30984  |
| 7.0             | 0.6495                                        | 1.250                                         | 5.62601E-4        | 0.22368  |
| 8.0             | 0.7443                                        | 1.256                                         | 3.79416E-4        | 0.1414   |
| 9.0             | 0.7716                                        | 1.228                                         | 2.10515E-4        | 0.12222  |
| 10              | 0.8001                                        | 1.200                                         | 1.43698E-4        | 0.06025  |
| 11              | 0.827                                         | 1.173                                         | 9.32868E-5        | 0.01764  |
| 12              | 0.760                                         | 1.039                                         | 7.02876E-5        | 0.04586  |
